# Supplementary material
Source: publisher site journal article supplement (https://www.spandidos-publications.com/1510/downloadSupplementary)

Figure S1. (A) Nucleotide sequence of the core promoter region of sfTSLP. The putative binding site for AP-2 $\alpha$  is marked by a box and the transcription start site is indicated by a dot. (B) Site-directed mutagenesis of AP-2 $\alpha$  were cloned in pGL3-Basic. The relative luciferase activity to wild-type pGL3 -201/+25. Each experiment was performed in triplicate and significant differences were determined with Welch's ANOVA and Tamhane test was used as a post hoc test. \*P<0.05. sf, short isoform; TSLP, thymic stromal lymphopoietin; AP-2 $\alpha$ , activating protein 2 $\alpha$ .

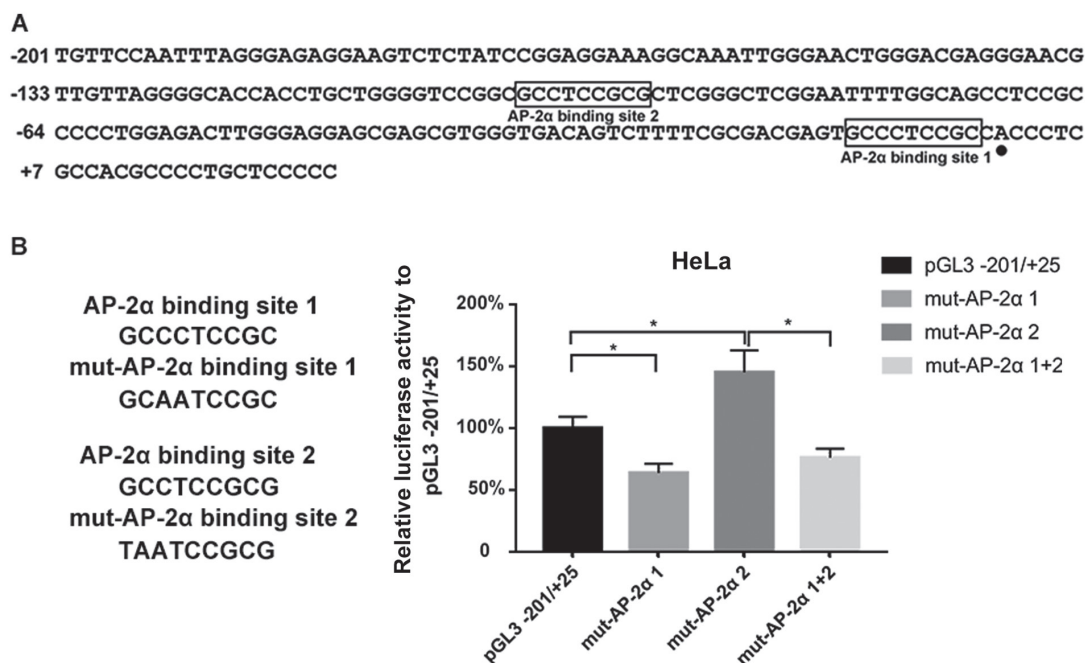

Supplement: Supplementary file 1 [file downloadSupplementary]
